# Supplementary material for: Hypertrophic effects of low-load blood flow restriction training with different repetition schemes: a systematic review and meta-analysis
Source: PeerJ journal article supplement (doi:10.7717/peerj.17195), 2024-06-17
Supplement: Supplement_Material_3.xlsx [file Supplement_Material_3.xlsx]

## Sheet: Planilha1
id	study		sample_size_hl	md_hl	sample_size_bfr	md_bfr	sd_pooled	subgroup	muscle_group	design_study	Meansure unit	es	se_es	muscle_group
1	Biazon et al. (2019)		20	2.2	20	2.3	6.27	Sets of 20 repetitions	Lower body	Within/between subjects	CSA (cm2)	-0.0156416	0.316233	Lower body
2	Buckner et al (2019)	40% AOP (Site 50%)	20	0.16	19	0.04	0.44	Failure	Upper body	Within/between subjects	Thickness (cm)	0.266108	0.321775	Upper body
2	Buckner et al (2019)	40% AOP (Site 60%)	20	0.15	19	0.06	0.40	Failure	Upper body	Within/between subjects	Thickness (cm)	0.221757	0.321344	Upper body
2	Buckner et al (2019)	40% AOP (Site 70%)	20	0.14	19	0.08	0.44	Failure	Upper body	Within/between subjects	Thickness (cm)	0.133054	0.320716	Upper body
2	Buckner et al (2019)	80% AOP (Site 50%)	20	0.16	20	0.06	0.45	Failure	Upper body	Within/between subjects	Thickness (cm)	0.219164	0.317176	Upper body
2	Buckner et al (2019)	80% AOP (Site 60%)	20	0.15	20	0.05	0.40	Failure	Upper body	Within/between subjects	Thickness (cm)	0.243516	0.317398	Upper body
2	Buckner et al (2019)	80% AOP (Site 70%)	20	0.14	20	0.11	0.45	Failure	Upper body	Within/between subjects	Thickness (cm)	0.0657493	0.316313	Upper body
3	Centner et al. (2022)	0% muscle length	15	0.19	14	-0.09	0.52	75 repetitions	Lower body	Between subjects	CSA (cm2)	0.523364	0.377912	Lower body
3	Centner et al. (2022)	10% muscle length	15	0.37	14	0.07	1.40	75 repetitions	Lower body	Between subjects	CSA (cm2)	0.208071	0.372615	Lower body
3	Centner et al. (2022)	20% muscle length	15	0.72	14	0.41	1.86	75 repetitions	Lower body	Between subjects	CSA (cm2)	0.161569	0.372217	Lower body
3	Centner et al. (2022)	30% muscle length	15	1.07	14	0.35	1.79	75 repetitions	Lower body	Between subjects	CSA (cm2)	0.39066	0.375135	Lower body
3	Centner et al. (2022)	40% muscle length	15	0.71	14	0.28	2.00	75 repetitions	Lower body	Between subjects	CSA (cm2)	0.208628	0.37262	Lower body
3	Centner et al. (2022)	50% muscle length	15	0.79	14	0.33	2.09	75 repetitions	Lower body	Between subjects	CSA (cm2)	0.213865	0.372671	Lower body
3	Centner et al. (2022)	60% muscle length	15	0.68	14	0.50	2.09	75 repetitions	Lower body	Between subjects	CSA (cm2)	0.083533	0.371774	Lower body
3	Centner et al. (2022)	70% muscle length	15	0.58	14	0.53	1.63	75 repetitions	Lower body	Between subjects	CSA (cm2)	0.0297695	0.371632	Lower body
3	Centner et al. (2022)	80% muscle length	15	0.20	14	0.23	1.21	75 repetitions	Lower body	Between subjects	CSA (cm2)	-0.0240962	0.371625	Lower body
3	Centner et al. (2022)	90% muscle length	15	0.17	14	0.08	0.75	75 repetitions	Lower body	Between subjects	CSA (cm2)	0.116568	0.371927	Lower body
3	Centner et al. (2022)	100% muscle length	15	0.03	14	0.03	0.35	75 repetitions	Lower body	Between subjects	CSA (cm2)	0	0.371612	Lower body
4	Centner et al. (2019)		14	1.10	11	1.5	3.99	75 repetitions	Lower body	Between subjects	CSA (cm2)	-0.0970136	0.403145	Lower body
5	Cook and Cleary (2019)	Knee extensor	11	3.0	10	3.5	11.7	Failure	Lower body	Between subjects	CSA (cm2)	-0.0410256	0.436977	Lower body
5	Cook and Cleary (2019)	Knee flexor	11	0.9	10	0.8	6.77	Failure	Lower body	Between subjects	CSA (cm2)	0.0141739	0.436937	Lower body
6	Cook et al. (2017)		12	2.8	12	3.3	12.51	Failure	Lower body	Between subjects	CSA (cm2)	-0.0386009	0.408286	Lower body
7	Cook et al. (2018)		6	95.0	6	49	502.90	Failure	Lower body	Between subjects	Mucle volume (cm3)	0.0844333	0.577607	Lower body
8	Ellefsen et al. (2015)	Proximal	15	4.0	15	2.8	11.48	Failure	Lower body	Within-subject	CSA (cm2)	0.0806265	0.365297	Lower body
8	Ellefsen et al. (2015)	Distal	15	3.7	15	3.1	11.36	Failure	Lower body	Within-subject	CSA (cm2)	0.0513734	0.365209	Lower body
9	Jesse et al. (2018)	40% AOP (Site 30%) - Anterior muscle thickness	20	0.22	19	0.06	0.53	Failure	Lower body	Within/between subjects	Thickness (cm)	0.295676	0.322106	Lower body
9	Jesse et al. (2018)	40% AOP (Site 40%) - Anterior muscle thickness	20	0.22	19	0.14	0.53	Failure	Lower body	Within/between subjects	Thickness (cm)	0.147838	0.320799	Lower body
9	Jesse et al. (2018)	40% AOP (Site 50%) - Anterior muscle thickness	20	0.21	19	0.19	0.53	Failure	Lower body	Within/between subjects	Thickness (cm)	0.0369595	0.320389	Lower body
9	Jesse et al. (2018)	40% AOP (Site 60%) - Anterior muscle thickness	20	0.25	19	0.22	0.53	Failure	Lower body	Within/between subjects	Thickness (cm)	0.0554393	0.320423	Lower body
9	Jesse et al. (2018)	40% AOP (Site 30%) - Lateral muscle thickness	20	0.09	19	0.02	0.57	Failure	Lower body	Within/between subjects	Thickness (cm)	0.119408	0.320647	Lower body
9	Jesse et al. (2018)	40% AOP (Site 40%) - Lateral muscle thickness	20	0.19	19	0.13	0.49	Failure	Lower body	Within/between subjects	Thickness (cm)	0.120958	0.320654	Lower body
9	Jesse et al. (2018)	40% AOP (Site 50%) - Lateral muscle thickness	20	0.16	19	0.13	0.49	Failure	Lower body	Within/between subjects	Thickness (cm)	0.0604792	0.320435	Lower body
9	Jesse et al. (2018)	40% AOP (Site 60%) - Lateral muscle thickness	20	0.15	19	0.18	0.44	Failure	Lower body	Within/between subjects	Thickness (cm)	-0.0665271	0.32045	Lower body
9	Jesse et al. (2018)	80% AOP (Site 30%) - Anterior muscle thickness	20	0.22	20	0.18	0.54	Failure	Lower body	Within/between subjects	Thickness (cm)	0.0730548	0.316333	Lower body
9	Jesse et al. (2018)	80% AOP (Site 40%) - Anterior muscle thickness	20	0.22	20	0.20	0.54	Failure	Lower body	Within/between subjects	Thickness (cm)	0.0365274	0.316254	Lower body
9	Jesse et al. (2018)	80% AOP (Site 50%) - Anterior muscle thickness	20	0.21	20	0.18	0.54	Failure	Lower body	Within/between subjects	Thickness (cm)	0.0547911	0.316287	Lower body
9	Jesse et al. (2018)	80% AOP (Site 60%) - Anterior muscle thickness	20	0.25	20	0.20	0.54	Failure	Lower body	Within/between subjects	Thickness (cm)	0.0913184	0.316393	Lower body
9	Jesse et al. (2018)	80% AOP (Site 30%) - Lateral muscle thickness	20	0.09	20	0.18	0.58	Failure	Lower body	Within/between subjects	Thickness (cm)	-0.151729	0.316682	Lower body
9	Jesse et al. (2018)	80% AOP (Site 40%) - Lateral muscle thickness	20	0.19	20	0.09	0.49	Failure	Lower body	Within/between subjects	Thickness (cm)	0.19924	0.317011	Lower body
9	Jesse et al. (2018)	80% AOP (Site 50%) - Lateral muscle thickness	20	0.16	20	0.08	0.49	Failure	Lower body	Within/between subjects	Thickness (cm)	0.159392	0.316729	Lower body
9	Jesse et al. (2018)	80% AOP (Site 60%) - Lateral muscle thickness	20	0.15	20	0.10	0.45	Failure	Lower body	Within/between subjects	Thickness (cm)	0.109582	0.316465	Lower body
10	Kataoka et al. (2022)	Posterior site	27	0.02	27	0.08	0.31	Failure	Lower body	Within-subject	Thickness (cm)	-0.189175	0.272774	Lower body
10	Kataoka et al. (2022)	Lateral site	27	0.01	27	0.06	0.29	Failure	Lower body	Within-subject	Thickness (cm)	-0.169013	0.272651	Lower body
11	Kubo et al. (2006)	Physiological CSA	9	4.5	9	5.7	9.5	Other	Lower body	Within-subject	CSA (cm2)	-0.120241	0.47183	Lower body
11	Kubo et al. (2006)	Muscle volume	9	140	9	133	209.55	Other	Lower body	Within-subject	Mucle volume (cm3)	0.0318145	0.471434	Lower body
12	Laurentino et al. (2022)		9	5.1	10	4.0	15.67	Sets of 15 repetitions	Lower body	Between subjects	CSA (cm2)	0.0670347	0.459597	Lower body
13	Libardi et al. (2015)		8	3.5	10	3.1	12.90	75 repetitions	Lower body	Between subjects	CSA (cm2)	0.0295278	0.474367	Lower body
14	Lixandrão et al. (2015)	20/40 (load /pressure)	9	5.0	11	0.70	13.97	Sets of 15 repetitions	Lower body	Within/between subjects	CSA (cm2)	0.294898	0.451879	Lower body
14	Lixandrão et al. (2015)	20/80 (load/ pressure)	9	5.0	14	2.80	10.90	Sets of 15 repetitions	Lower body	Within/between subjects	CSA (cm2)	0.19454	0.428208	Lower body
14	Lixandrão et al. (2015)	40/40 (load/pressure)	9	5.0	8	3.60	11.48	Sets of 15 repetitions	Lower body	Within/between subjects	CSA (cm2)	0.115794	0.486318	Lower body
14	Lixandrão et al. (2015)	40/80 (load/pressure)	9	5.0	10	4.60	12.06	Sets of 15 repetitions	Lower body	Within/between subjects	CSA (cm2)	0.0316892	0.459497	Lower body
15	May et al. (2022)	Knee extensor	9	0.2	8	1.30	7.93	75 repetitions	Lower body	Between subjects	CSA (cm2)	-0.131733	0.486438	Lower body
15	May et al. (2022)	Knee flexor	9	1.60	8	1.40	4.25	75 repetitions	Lower body	Between subjects	CSA (cm2)	0.0446444	0.485973	Lower body
15	May et al. (2022)	Total muscle CSA	9	3.1	8	4.1	20.94	75 repetitions	Lower body	Between subjects	Total muscle CSA (cm2)	-0.0453336	0.485975	Lower body
16	Pereira et al. (2019)		9	2.3	9	3.8	9.71	Sets of 15 repetitions	Lower body	Between subjects	CSA (cm2)	-0.147139	0.472042	Lower body
17	Ozaki et al. (2013)		9	5.8	10	3.5	9.64	75 repetitions	Upper body	Between subjects	CSA (cm2)	0.227967	0.460954	Upper body
18	Ramis et al. (2018)	Biceps brachii	13	2.8	15	2.10	3.24	VT equalized	Upper body	Between subjects	Thickness (mm)	0.209633	0.379966	Upper body
18	Ramis et al. (2018)	Knee extensor	13	3.5	15	3.10	12.03	VT equalized	Lower body	Between subjects	Thickness (mm)	0.0322806	0.378957	Lower body
19	Reece et al. (2023)		7	1.8	7	1.30	3.63	Failure	Lower body	Between subjects	CSA (cm2)	0.1195	0.3655	Lower body
20	Teixeira et al. (2020)		16	5.3	16	6.0	14.5	Sets of 15 repetitions	Lower body	Within-subject	CSA (cm2)	-0.0470588	0.353602	Lower body
21	Vechin et al. (2015)		8	4.2	8	4.0	18.5	75 repetitions	Lower body	Between subjects	CSA (cm2)	0.0102229	0.500003	Lower body
22	Yasuda et al. (2011)	Triceps brachii	10	1.9	10	0.90	4.17	75 repetitions	Upper body	Between subjects	CSA (cm2)	0.229437	0.448683	Upper body
22	Yasuda et al. (2011)	Pectoralis major	10	5.1	10	2.90	5.58	75 repetitions	Upper body	Between subjects	CSA (cm2)	0.377797	0.4512	Upper body
